# Supplementary material for: Hydrophobic modification of a polyurethane sponge via emulsion polymerization for selective oil–water separation
Source: Royal Society of Chemistry journal article supplement (doi:10.1039/d6ra01253a), 2026-05-18
Supplement: d6ra01253a1.pdf [file d6ra01253a1.pdf]

# **Hydrophobic Modification of Polyurethane Sponge via Emulsion Polymerization for Selective Oil-Water Separation**

*Md. Ariful Islam Setu<sup>a</sup>, Md. Rezaul Haque<sup>a</sup>, Md. Suzon Ahmed<sup>a</sup>, Ahmed B.M. Ibrahim<sup>b</sup>,  
Muhammad Sarwar Hossain<sup>a</sup> and, Md. Kamrul Hasan<sup>a\*</sup>*

<sup>a</sup> Chemistry Discipline, Khulna University, Khulna-9208, Bangladesh

<sup>b</sup> Department of Chemistry, College of Science, Imam Mohammad Ibn Saud Islamic University  
(IMSIU), Riyadh 11623, Saudi Arabia

*\*Corresponding author.*

***Md. Kamrul Hasan***

E-mail address: mkhasan@ku.ac.bd

Chemistry Discipline, Khulna University, Khulna-9208, Bangladesh

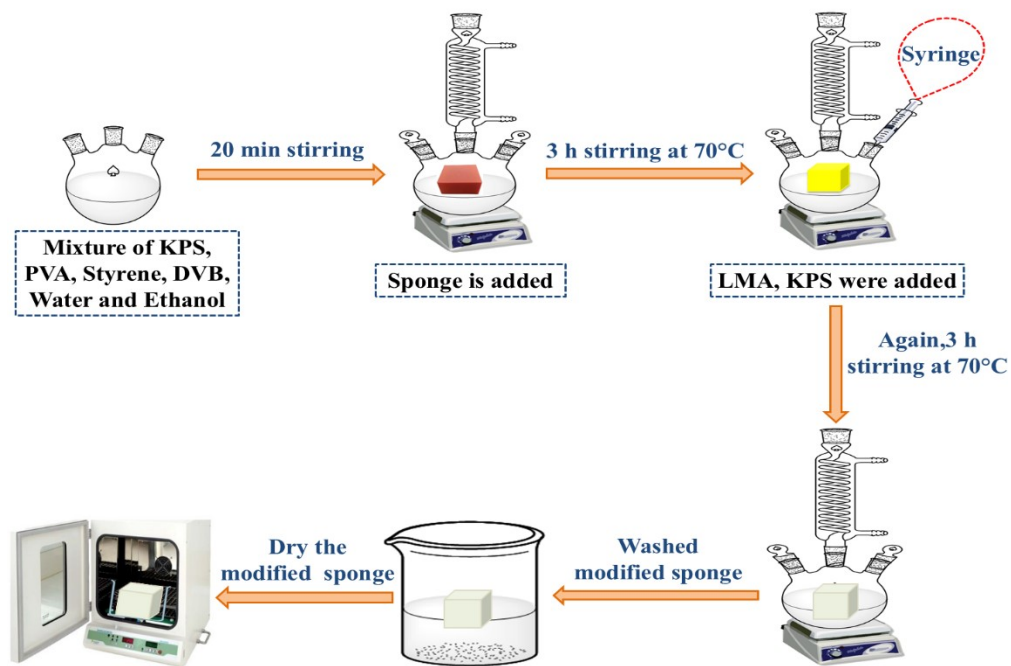

**Figure S1.** The experimental protocol for fabrication of superhydrophobic/superoleophilic PU sponge.

**Table S1.** Modification of PU sponge using different amounts of styrene (Run-1)

| Sample code | Step-1     |        | Step-2 | Contact angle (°) |
|-------------|------------|--------|--------|-------------------|
|             | Styrene(g) | DVB(g) | LMA(g) |                   |
| S-1         | 0.50       | 0.004  | 0.2    | 137 ± 2.0         |
| S-2         | 0.75       | 0.004  | 0.2    | 145 ± 1.5         |
| S-3         | 1.00       | 0.004  | 0.2    | 150 ± 2.5         |
| S-4         | 1.25       | 0.004  | 0.2    | 142 ± 2.8         |
| S-5         | 1.50       | 0.004  | 0.2    | 133 ± 3.2         |

Note: In the 1<sup>st</sup> step: H<sub>2</sub>O = 20 g, ethanol = 10 g, PVA = 0.02 g and KPS = 0.036. In the 2<sup>nd</sup> step: KPS = 0.03 g. Polymerization temperature 70 °C.

**Table S2.** Modification of PU sponge using different amounts of LMA (Run-2).

| Sample code | Step-1     |        | Step-2 | Contact angle (°) |
|-------------|------------|--------|--------|-------------------|
|             | Styrene(g) | DVB(g) | LMA(g) |                   |
| S-6         | 1.00       | 0.004  | 0.10   | 143 ± 2.1         |
| S-7         | 1.00       | 0.004  | 0.15   | 148 ± 1.0         |
| S-8         | 1.00       | 0.004  | 0.20   | 150 ± 2.5         |
| S-9         | 1.00       | 0.004  | 0.25   | 139 ± 1.6         |
| S-10        | 1.00       | 0.004  | 0.30   | 135 ± 0.5         |

Note: In the 1<sup>st</sup> step: H<sub>2</sub>O = 20 g, ethanol = 10 g, PVA = 0.02 g and KPS = 0.036. In the 2<sup>nd</sup> step: KPS = 0.03 g. Polymerization temperature 70 °C.

**Table S3.** Modification of PU sponge using different amounts of DVB (Run-3).

| Sample code | Step-1     |        | Step-2 | Contact angle (°) |
|-------------|------------|--------|--------|-------------------|
|             | Styrene(g) | DVB(g) | LMA(g) |                   |
| S-11        | 1.00       | 0.003  | 0.2    | 140 ± 3.0         |
| S-12        | 1.00       | 0.004  | 0.2    | 150 ± 2.5         |
| S-13        | 1.00       | 0.005  | 0.2    | 152 ± 1.2         |
| S-14        | 1.00       | 0.006  | 0.2    | 145 ± 2.0         |
| S-15        | 1.00       | 0.007  | 0.2    | 136 ± 3.2         |

Note: In the 1<sup>st</sup> step: H<sub>2</sub>O = 20 g, ethanol = 10 g, PVA = 0.02 g and KPS = 0.036. In the 2<sup>nd</sup> step:

KPS = 0.03 g. Polymerization temperature 70 °C.

**Table S4.** Modification of PU sponge using different ratios of water-ethanol (Run-4).

| Sample code | Step-1     |          |            | Step-2  | Contact angle (°) |
|-------------|------------|----------|------------|---------|-------------------|
|             | Styrene(g) | Water(g) | Ethanol(g) | LMA (g) |                   |
| S-16        | 1.00       | 25       | 05         | 0.2     | 140 ± 2.5         |
| S-17        | 1.00       | 20       | 10         | 0.2     | 149 ± 1.5         |
| S-18        | 1.00       | 15       | 15         | 0.2     | 154 ± 2.0         |
| S-19        | 1.00       | 10       | 20         | 0.2     | 147 ± 2.0         |
| S-20        | 1.00       | 05       | 25         | 0.2     | 135 ± 0.5         |

Note: In the 1<sup>st</sup> step: DVB = 0.005 g, PVA = 0.02 g and KPS = 0.036. In the 2<sup>nd</sup> step: KPS = 0.03 g. Polymerization temperature 70 °C.
